# Supplementary material for: Height and Risk of Vitiligo: A Nationwide Cohort Study
Source: MDPI journal article supplement (doi:10.3390/jcm10173958), 2021-08-31
Supplement: s1 [file s1]

## Supplementary Materials

**Supplementary Table S1.** Table that illustrates cut-off value of the height of quintile according to age and sex.

| Age   | Sex    | Number of<br>individuals | Height          |                             |                             |                             |         |
|-------|--------|--------------------------|-----------------|-----------------------------|-----------------------------|-----------------------------|---------|
|       |        |                          | 1st<br>quintile | 2 <sup>nd</sup><br>quintile | 3 <sup>rd</sup><br>quintile | 4 <sup>th</sup><br>quintile | Maximum |
| 20–29 | Male   | 1253255                  | 169             | 172                         | 175                         | 179                         | 209     |
|       | Female | 1203892                  | 157             | 160                         | 162                         | 165                         | 198     |
| 30–39 | Male   | 2187697                  | 167             | 171                         | 174                         | 177                         | 207     |
|       | Female | 932490                   | 155             | 158                         | 161                         | 164                         | 196     |
| 40–49 | Male   | 2039121                  | 165             | 168                         | 171                         | 174                         | 202     |
|       | Female | 1851139                  | 153             | 156                         | 158                         | 161                         | 199     |
| 50–59 | Male   | 1581193                  | 163             | 166                         | 169                         | 172                         | 200     |
|       | Female | 1687437                  | 151             | 154                         | 157                         | 160                         | 204     |
| 60–69 | Male   | 964084                   | 161             | 164                         | 167                         | 170                         | 198     |
|       | Female | 1061340                  | 149             | 152                         | 154                         | 157                         | 198     |
| ≥70   | Male   | 530619                   | 159             | 162                         | 165                         | 169                         | 198     |
|       | Female | 688487                   | 145             | 148                         | 151                         | 154                         | 197     |
